# Supplementary material for: The Degradation Process of Typical Neonicotinoid Insecticides in Tidal Streams in Subtropical Cities: A Case Study of the Wuchong Stream, South China
Source: MDPI journal article supplement (doi:10.3390/toxics11030203), 2023-02-22
Supplement: s1 [file s1]

## Supplementary Material

### Spatial Distribution and Ecological Risks of Neonicotinoid Insecticides in an Urban Tidal Stream of Guangzhou City, South China

This file includes:

Table S1 The quality of water sample in Wuchong Stream

Table S2 Optimized LC-MS/MS parameters and retention times of target NEOs analyzed.

Table S3 The gradient elution program of LC-MS/MS.

Table S4 Linear range of matrix matched calibration curves for NEOs studied.

Table S5 The results of target NEOs in hydrolysis degradation experiment.

Table S6 Analysis of the variable table of target NEOs in hydrolysis degradation experiment.

Table S7 The results of target NEOs in the photolysis degradation experiment

Table S8 Analysis of variable table of target NEOs in photolysis degradation experiment.

Table S9 The results of target NEOs in biodegradation experiment

Table S10 Analysis of variable table of target NEOs in biodegradation experiment.

Figure S1 Rotary photochemical reactor.

Equations (S1)–(S4):The hydrolysis rates of NEOs;

Equations (S5)–(S8):The photolysis rates of NEOs;

Equations (S9)–(S12):The biodegradation rates of NEOs.

Table S1. The quality of water sample in Wuchong Stream

| Water<br>sapmle | Ph   | TDS | COD    | TP    | NO <sub>2</sub> <sup>-</sup> | NH <sub>4</sub> -N | T    | DO  | Saility |
|-----------------|------|-----|--------|-------|------------------------------|--------------------|------|-----|---------|
|                 | 7.55 | 410 | 120.39 | 0.071 | 0.003                        | 1.01               | 31.8 | 4.2 | 0.44    |

Table S2. Optimized LC-MS/MS parameters and retention times of target NEOs analyzed

| Compound | MRM transition<br>(m/z) | Fragment<br>voltage<br>(V) | Collision<br>energy<br>(eV) | Retention<br>time<br>(min) | Ionization<br>mode |
|----------|-------------------------|----------------------------|-----------------------------|----------------------------|--------------------|
| IMI      | 175~256.2               | 60                         | 20                          | 10.69                      | [M-H] <sup>+</sup> |
|          | 209~256.2               | 60                         | 20                          | 10.69                      | [M-H] <sup>+</sup> |
| ACE      | 126~223.1               | 130                        | 20                          | 10.99                      | [M-H] <sup>+</sup> |
|          | 187~223.1               | 130                        | 20                          | 10.99                      | [M-H] <sup>+</sup> |
| THA      | 126~253                 | 130                        | 25                          | 11.61                      | [M-H] <sup>+</sup> |
|          | 186~253                 | 130                        | 25                          | 11.61                      | [M-H] <sup>+</sup> |
| CLO      | 169~250                 | 80                         | 20                          | 10.46                      | [M-H] <sup>+</sup> |
|          | 132~250                 | 80                         | 20                          | 10.46                      | [M-H] <sup>+</sup> |
| IMI-d4   | 214~260.7               | 130                        | 25                          | 12.46                      | [M-H] <sup>+</sup> |
|          | 180~260.7               | 130                        | 25                          | 12.46                      | [M-H] <sup>+</sup> |
| CLO-d3   | 199~217                 | 130                        | 15                          | 12.07                      | [M-H] <sup>+</sup> |
|          | 126~217                 | 130                        | 25                          | 12.07                      | [M-H] <sup>+</sup> |

Table S3. The gradient elution program of LC-MS/MS

| Time | Module            | Event        | Parameter |
|------|-------------------|--------------|-----------|
| 0.2  | Pumps             | PumpB. Con.c | 40        |
| 5.0  | Pumps             | PumpB. Con.c | 90        |
| 6.0  | Pumps             | PumpB. Con.c | 90        |
| 6.10 | Pumps             | PumpB. Con.c | 40        |
| 10   | System Controller | Stop         |           |

Table S4. Linear range of matrix matched calibration curves for NEOs studied

| Analytes | Range of curve<br>(ng/L) | Calibration curve   | <i>r</i> | LOD<br>ng/L | LOQ<br>ng/L | Average<br>recovery<br>(%) | Matrix<br>effect<br>(%) |
|----------|--------------------------|---------------------|----------|-------------|-------------|----------------------------|-------------------------|
| CLO      | 0.1 ~ 1000               | $y = 20.13x + 0.44$ | 0.99822  | 0.03        | 0.09        | 92.5                       | 0.12                    |
| IMI      | 0.1 ~ 1000               | $y = 3.50x - 0.064$ | 0.99822  | 0.04        | 0.12        | 102.3                      | 1.53                    |
| ACE      | 0.1 ~ 1000               | $y = 14.15x + 0.47$ | 0.99804  | 0.03        | 0.09        | 93.6                       | 5.61                    |
| THA      | 0.1 ~ 1000               | $y = 25.54x + 2.16$ | 0.99878  | 0.05        | 0.15        | 94.1                       | 0.87                    |

Table S5. The results of target NEOs in hydrolysis degradation experiment

| Run | Factor 1 | Factor 2 | Factor 3         | Factor 4 | Factor 5     | Factor 6           | C/C <sub>0</sub> |       |       |       |
|-----|----------|----------|------------------|----------|--------------|--------------------|------------------|-------|-------|-------|
|     | C0 (ppb) | Time (h) | Temperature (°C) | Ph       | Salinity (%) | Humic acids (mg/L) | CLO              | THA   | IMI   | ACE   |
| 1   | 1000.00  | 63.00    | 20.00            | 7.25     | 0.36         | 15.01              | 0.82             | 0.155 | 0.144 | 0.694 |
| 2   | 188.72   | 99.42    | 30.22            | 7.73     | 0.58         | 24.59              | 0.456            | 0.119 | 0.120 | 0.130 |
| 3   | 505.00   | 63.00    | 20.00            | 7.25     | 0.36         | 30.00              | 0.416            | 0.415 | 0.333 | 0.400 |
| 4   | 505.00   | 6.00     | 20.00            | 7.25     | 0.36         | 15.01              | 0.917            | 0.470 | 0.240 | 0.709 |
| 5   | 505.00   | 63.00    | 36.00            | 7.25     | 0.36         | 15.01              | 0.595            | 0.338 | 0.214 | 0.340 |
| 6   | 505.00   | 63.00    | 20.00            | 7.25     | 0.36         | 15.01              | 0.715            | 0.415 | 0.333 | 0.459 |
| 7   | 505.00   | 63.00    | 20.00            | 7.25     | 0.03         | 15.01              | 0.713            | 0.412 | 0.333 | 0.503 |
| 8   | 188.72   | 26.58    | 9.78             | 6.77     | 0.58         | 5.43               | 0.856            | 0.433 | 0.080 | 0.117 |
| 9   | 505.00   | 63.00    | 20.00            | 7.25     | 0.36         | 15.01              | 0.715            | 0.415 | 0.333 | 0.459 |
| 10  | 188.72   | 26.58    | 30.22            | 7.73     | 0.58         | 5.43               | 0.670            | 0.146 | 0.066 | 0.101 |
| 11  | 821.28   | 99.42    | 30.22            | 6.77     | 0.15         | 24.59              | 0.661            | 0.113 | 0.102 | 0.234 |
| 12  | 821.28   | 99.42    | 30.22            | 6.77     | 0.58         | 5.43               | 0.629            | 0.097 | 0.077 | 0.259 |
| 13  | 188.72   | 26.58    | 30.22            | 7.73     | 0.15         | 24.59              | 0.479            | 0.413 | 0.663 | 0.991 |
| 14  | 821.28   | 26.58    | 9.78             | 7.73     | 0.15         | 24.59              | 0.731            | 0.211 | 0.180 | 0.494 |
| 15  | 821.28   | 26.58    | 30.22            | 7.73     | 0.58         | 24.59              | 0.522            | 0.186 | 0.090 | 0.478 |
| 16  | 188.72   | 99.42    | 9.78             | 7.73     | 0.58         | 5.43               | 0.384            | 0.213 | 0.535 | 0.661 |
| 17  | 188.72   | 99.42    | 9.78             | 6.77     | 0.58         | 24.59              | 0.404            | 0.360 | 0.862 | 0.855 |
| 18  | 505.00   | 120.00   | 20.00            | 7.25     | 0.36         | 15.01              | 0.514            | 0.415 | 0.333 | 0.261 |
| 19  | 821.28   | 99.42    | 30.22            | 7.73     | 0.15         | 5.43               | 0.674            | 0.081 | 0.053 | 0.210 |
| 20  | 821.28   | 99.42    | 9.78             | 7.73     | 0.58         | 24.59              | 0.609            | 0.163 | 0.107 | 0.299 |
| 21  | 505.00   | 63.00    | 20.00            | 6.50     | 0.36         | 15.01              | 0.614            | 0.444 | 0.473 | 0.748 |
| 22  | 505.00   | 63.00    | 20.00            | 7.25     | 0.36         | 15.01              | 0.715            | 0.415 | 0.333 | 0.459 |
| 23  | 505.00   | 63.00    | 20.00            | 7.25     | 0.70         | 15.01              | 0.583            | 0.415 | 0.333 | 0.519 |
| 24  | 505.00   | 63.00    | 20.00            | 8.00     | 0.36         | 15.01              | 0.654            | 0.390 | 0.293 | 0.401 |
| 25  | 188.72   | 26.58    | 30.22            | 6.77     | 0.58         | 24.59              | 0.505            | 0.126 | 0.400 | 0.048 |
| 26  | 505.00   | 63.00    | 20.00            | 7.25     | 0.36         | 15.01              | 0.715            | 0.415 | 0.333 | 0.459 |
| 27  | 188.72   | 99.42    | 9.78             | 7.73     | 0.15         | 24.59              | 0.346            | 0.041 | 0.497 | 0.040 |
| 28  | 821.28   | 26.58    | 9.78             | 7.73     | 0.58         | 5.43               | 0.749            | 0.211 | 0.667 | 0.323 |
| 29  | 505.00   | 63.00    | 20.00            | 7.25     | 0.36         | 0.02               | 0.514            | 0.415 | 0.333 | 0.519 |
| 30  | 505.00   | 63.00    | 20.00            | 7.25     | 0.36         | 15.01              | 0.715            | 0.415 | 0.313 | 0.459 |
| 31  | 188.72   | 99.42    | 30.22            | 6.77     | 0.15         | 5.43               | 0.293            | 0.314 | 0.506 | 0.539 |

|    |        |       |       |      |      |       |       |       |       |       |
|----|--------|-------|-------|------|------|-------|-------|-------|-------|-------|
| 32 | 188.72 | 26.58 | 9.78  | 6.77 | 0.15 | 24.59 | 0.876 | 0.175 | 0.846 | 0.500 |
| 33 | 188.72 | 26.58 | 9.78  | 7.73 | 0.15 | 5.43  | 0.830 | 0.208 | 0.650 | 0.661 |
| 34 | 821.28 | 99.42 | 30.22 | 6.77 | 0.15 | 5.43  | 0.692 | 0.147 | 0.204 | 0.396 |
| 35 | 821.28 | 99.42 | 9.78  | 6.77 | 0.15 | 5.43  | 0.759 | 0.187 | 0.387 | 0.822 |
| 36 | 821.28 | 26.58 | 9.78  | 6.77 | 0.58 | 24.59 | 0.881 | 0.250 | 0.606 | 0.798 |
| 37 | 821.28 | 26.58 | 30.22 | 6.77 | 0.15 | 5.43  | 0.516 | 0.202 | 0.248 | 0.527 |
| 38 | 505.00 | 63.00 | 4.00  | 7.25 | 0.36 | 15.01 | 0.974 | 0.517 | 0.748 | 0.975 |
| 39 | 10.00  | 63.00 | 20.00 | 7.25 | 0.36 | 15.01 | 0.536 | 0.269 | 0.500 | 0.305 |
| 40 | 505.00 | 63.00 | 20.00 | 7.25 | 0.36 | 15.01 | 0.715 | 0.415 | 0.333 | 0.459 |

---

Table S6. Analysis of variable table of target NEOs in hydrolysis degradation experiment

| Source         | CLO     |          | ACE     |          | IMI     |          | THA     |          |
|----------------|---------|----------|---------|----------|---------|----------|---------|----------|
|                | F-Value | P-value  | F-Value | P-value  | F-Value | P-value  | F-Value | P-value  |
| Model          | 28.53   | < 0.0001 | 22.14   | < 0.0001 | 6.82    | < 0.0001 | 15.46   | < 0.0001 |
| A-C0           | 53.89   | < 0.0001 | 77.58   | < 0.0001 | 1.24    | 0.2778   | 15.82   | 0.0010   |
| B-Time         | 102.48  | < 0.0001 | 4.47    | 0.00460  | 4.18    | 0.0536   | 7.89    | 0.0121   |
| C-temperature  | 108.44  | < 0.0001 | 87.58   | < 0.0001 | 19.52   | 0.0002   | 8.66    | 0.0091   |
| D-pH           | 0.032   | 0.8606   | 8.67    | 0.0075   | 5.53    | 0.0285   | 7.14    | 0.0161   |
| E-Salinity     | 0.041   | 0.8412   | 4.68    | 0.0417   | 4.36    | 0.0491   | 0.0012  | 0.9147   |
| F-Humic acids  | 0.60    | 0.4476   | 3.38    | 0.0795   | 0.33    | 0.5703   | 0.58    | 0.4558   |
| R <sup>2</sup> | 0.9607  |          | 0.9448  |          | 0.854   |          | 0.9524  |          |
| Adep Precision | 31.329  |          | 18.129  |          | 10.763  |          | 11.860  |          |



Table S7. The results of target NEOs in photolysis degradation experiment

| Run | Factor 1 | Factor 2 | Factor 3     | Factor 4         | Factor 5    | Factor 6         | Factor 7          | C/C0  |       |      |     |
|-----|----------|----------|--------------|------------------|-------------|------------------|-------------------|-------|-------|------|-----|
|     | C0 (ppb) | pH       | Salinity (%) | Temperature (°C) | Time (time) | Light energy (W) | Humic acids(mg/L) | CLO   | THA   | IMI  | ACE |
| 1   | 546.69   | 7.61     | 0.66         | 34.22            | 27.15       | 196.64           | 24.23             | 0.549 | 0.412 | 0.66 | 0.6 |
|     | 1100.00  | 7.00     | 0.43         | 25.00            | 62.50       | 502.50           | 15.01             | 0.787 | 0.590 | 0.84 | 0.9 |
| 3   | 1100.00  | 7.00     | 0.43         | 25.00            | 62.50       | 502.50           | 15.01             | 0.787 | 0.590 | 0.84 | 0.9 |
| 4   | 1100.00  | 8.00     | 0.43         | 25.00            | 62.50       | 502.50           | 15.01             | 0.636 | 0.477 | 0.69 | 0.7 |
| 5   | 200.00   | 7.00     | 0.43         | 25.00            | 62.50       | 502.50           | 15.01             | 0.782 | 0.587 | 0.58 | 0.9 |
| 6   | 1653.31  | 6.39     | 0.19         | 34.22            | 97.85       | 196.64           | 5.79              | 0.596 | 0.447 | 0.63 | 0.7 |
| 7   | 1100.00  | 7.00     | 0.43         | 25.00            | 120.00      | 502.50           | 15.01             | 0.695 | 0.521 | 0.75 | 0.8 |
| 8   | 1653.31  | 6.39     | 0.66         | 15.78            | 97.85       | 196.64           | 5.79              | 0.763 | 0.572 | 0.80 | 0.9 |
| 9   | 1653.31  | 6.39     | 0.19         | 15.78            | 97.85       | 196.64           | 24.23             | 0.702 | 0.527 | 0.74 | 0.8 |
| 10  | 546.69   | 7.61     | 0.66         | 15.78            | 97.85       | 196.64           | 24.23             | 0.626 | 0.469 | 0.74 | 0.7 |
| 11  | 1100.00  | 7.00     | 0.43         | 25.00            | 62.50       | 502.50           | 15.01             | 0.787 | 0.590 | 0.84 | 0.9 |
| 12  | 546.69   | 6.39     | 0.66         | 34.22            | 27.15       | 808.36           | 24.23             | 0.659 | 0.494 | 0.77 | 0.7 |
| 13  | 546.69   | 7.61     | 0.19         | 34.22            | 97.85       | 808.36           | 5.79              | 0.465 | 0.349 | 0.58 | 0.5 |
| 14  | 1653.31  | 7.61     | 0.66         | 15.78            | 27.15       | 808.36           | 24.23             | 0.528 | 0.396 | 0.57 | 0.6 |
| 15  | 1653.31  | 6.39     | 0.66         | 34.22            | 97.85       | 196.64           | 24.23             | 0.591 | 0.443 | 0.63 | 0.7 |
| 16  | 546.69   | 7.61     | 0.19         | 15.78            | 27.15       | 808.36           | 24.23             | 0.674 | 0.505 | 0.78 | 0.8 |
| 17  | 1100.00  | 7.00     | 0.05         | 25.00            | 62.50       | 502.50           | 15.01             | 0.787 | 0.590 | 0.84 | 0.9 |
| 18  | 2000.00  | 7.00     | 0.43         | 25.00            | 62.50       | 502.50           | 15.01             | 0.780 | 0.585 | 0.81 | 0.9 |
| 19  | 1100.00  | 7.00     | 0.43         | 25.00            | 62.50       | 502.50           | 30.00             | 0.598 | 0.579 | 0.83 | 0.9 |
| 20  | 546.69   | 6.39     | 0.66         | 15.78            | 27.15       | 196.64           | 24.23             | 0.878 | 0.658 | 0.99 | 1.0 |
| 21  | 546.69   | 6.39     | 0.66         | 34.22            | 97.85       | 196.64           | 5.79              | 0.449 | 0.337 | 0.56 | 0.5 |
| 22  | 1100.00  | 7.00     | 0.43         | 25.00            | 62.50       | 1000.00          | 15.01             | 0.687 | 0.515 | 0.74 | 0.8 |
| 23  | 1100.00  | 7.00     | 0.43         | 40.00            | 62.50       | 502.50           | 15.01             | 0.649 | 0.487 | 0.70 | 0.7 |
| 24  | 1100.00  | 7.00     | 0.43         | 25.00            | 62.50       | 5.00             | 15.01             | 0.827 | 0.620 | 0.88 | 0.9 |
| 25  | 1653.31  | 7.61     | 0.19         | 15.78            | 27.15       | 196.64           | 24.23             | 0.813 | 0.610 | 0.85 | 0.9 |
| 26  | 546.69   | 6.39     | 0.19         | 15.78            | 97.85       | 808.36           | 5.79              | 0.772 | 0.579 | 0.88 | 0.9 |
| 27  | 1100.00  | 7.00     | 0.43         | 25.00            | 62.50       | 502.50           | 15.01             | 0.787 | 0.590 | 0.84 | 0.9 |
| 28  | 1653.31  | 6.39     | 0.66         | 34.22            | 97.85       | 808.36           | 5.79              | 0.476 | 0.357 | 0.51 | 0.5 |
| 29  | 1100.00  | 7.00     | 0.43         | 25.00            | 62.50       | 502.50           | 15.01             | 0.787 | 0.590 | 0.84 | 0.9 |
| 30  | 1100.00  | 7.00     | 0.43         | 25.00            | 5.00        | 502.50           | 15.01             | 0.930 | 0.697 | 0.98 | 0.9 |
| 31  | 546.69   | 6.39     | 0.19         | 34.22            | 97.85       | 808.36           | 24.23             | 0.503 | 0.377 | 0.61 | 0.6 |

|    |         |      |      |       |       |        |       |       |       |      |     |
|----|---------|------|------|-------|-------|--------|-------|-------|-------|------|-----|
| 32 | 1100.00 | 7.00 | 0.43 | 10.00 | 62.50 | 502.50 | 15.01 | 0.842 | 0.631 | 0.90 | 0.9 |
| 33 | 546.69  | 7.61 | 0.19 | 15.78 | 97.85 | 196.64 | 5.79  | 0.626 | 0.469 | 0.74 | 0.7 |
| 34 | 1653.31 | 7.61 | 0.19 | 34.22 | 27.15 | 808.36 | 24.23 | 0.395 | 0.296 | 0.43 | 0.4 |
| 35 | 546.69  | 6.39 | 0.19 | 34.22 | 27.15 | 196.64 | 24.23 | 0.852 | 0.625 | 0.94 | 0.9 |
| 36 | 1653.31 | 6.39 | 0.66 | 34.22 | 27.15 | 196.64 | 5.79  | 0.832 | 0.624 | 0.87 | 0.9 |
| 37 | 1653.31 | 7.61 | 0.19 | 15.78 | 27.15 | 808.36 | 5.79  | 0.516 | 0.387 | 0.55 | 0.6 |
| 38 | 546.69  | 6.39 | 0.19 | 34.22 | 27.15 | 808.36 | 5.79  | 0.662 | 0.497 | 0.77 | 0.7 |
| 39 | 1653.31 | 7.61 | 0.66 | 34.22 | 97.85 | 808.36 | 24.23 | 0.347 | 0.261 | 0.38 | 0.4 |
| 40 | 546.69  | 6.39 | 0.66 | 15.78 | 27.15 | 808.36 | 5.79  | 0.772 | 0.579 | 0.88 | 0.9 |
| 41 | 546.69  | 7.61 | 0.66 | 15.78 | 97.85 | 808.36 | 5.79  | 0.370 | 0.277 | 0.48 | 0.4 |
| 42 | 1653.31 | 7.61 | 0.19 | 15.78 | 97.85 | 808.36 | 24.23 | 0.407 | 0.306 | 0.44 | 0.5 |
| 43 | 546.69  | 7.61 | 0.66 | 15.78 | 27.15 | 196.64 | 5.79  | 0.835 | 0.626 | 0.94 | 0.9 |
| 44 | 1653.31 | 7.61 | 0.66 | 34.22 | 97.85 | 196.64 | 5.79  | 0.651 | 0.488 | 0.69 | 0.7 |
| 45 | 1100.00 | 7.00 | 0.43 | 25.00 | 62.50 | 502.50 | 0.02  | 0.751 | 0.563 | 0.81 | 0.8 |
| 46 | 1100.00 | 7.00 | 0.80 | 25.00 | 62.50 | 502.50 | 15.01 | 0.787 | 0.590 | 0.84 | 0.9 |
| 47 | 1653.31 | 6.39 | 0.19 | 15.78 | 27.15 | 808.36 | 24.23 | 0.589 | 0.441 | 0.63 | 0.7 |
| 48 | 1100.00 | 6.00 | 0.43 | 25.00 | 62.50 | 502.50 | 15.01 | 0.147 | 0.671 | 0.95 | 0.8 |
| 49 | 1653.31 | 7.61 | 0.19 | 34.22 | 27.15 | 196.64 | 5.79  | 0.771 | 0.578 | 0.81 | 0.9 |
| 50 | 1100.00 | 7.00 | 0.43 | 25.00 | 62.50 | 502.50 | 15.01 | 0.787 | 0.590 | 0.84 | 0.9 |

---

Table S8. Analysis of variabce table of target NEOs in photolysis degradation experiment

| Source             | CLO     |          | ACE     |          | IMI     |          | THA     |          |
|--------------------|---------|----------|---------|----------|---------|----------|---------|----------|
|                    | F-Value | P-value  | F-Value | P-value  | F-Value | P-value  | F-Value | P-value  |
| Model              | 13.54   | < 0.0001 | 12.17   | < 0.0001 | 12.25   | < 0.0001 | 18.24   | < 0.0001 |
| A-C0               | 1.24    | 0.3044   | 3.15    | 0.0859   | 0.23    | 0.6369   | 0.26    | 0.6145   |
| B- pH              | 0.71    | 0.3894   | 21.95   | < 0.0001 | 17.97   | 0.0003   | 35.70   | < 0.0001 |
| C-Salinity         | 0.059   | 0.7558   | 0.54    | 0.4664   | 1.30    | 0.2652   | 0.85    | 0.3646   |
| D- temperature     | 11.94   | 0.0013   | 31.70   | < 0.0001 | 43.48   | < 0.0001 | 46.70   | < 0.0001 |
| E-time             | 27.44   | < 0.0001 | 41.80   | < 0.0001 | 46.14   | < 0.0001 | 67.21   | < 0.0001 |
| F- solar radiation | 31.25   | < 0.0001 | 45.68   | < 0.0001 | 67.74   | < 0.0001 | 80.22   | < 0.0001 |
| G-Humic acids      | 1.05    | 0.3110   | 0.33    | 0.5690   | 0.47    | 0.5002   | 0.25    | 0.6196   |
| R <sup>2</sup>     | 0.7593  |          | 0.8852  |          | 0.93    |          | 0.92    |          |
| Adep Precision     | 13.868  |          | 14.526  |          | 13.644  |          | 16.91   |          |

Table S9. The results of target NEOs in the biodegradation degradation experiment

| Run | Factor 1 | Factor 2 | Factor 3         | Factor 4 | Factor 5     | Factor 6           | C/C0 |      |      |      |
|-----|----------|----------|------------------|----------|--------------|--------------------|------|------|------|------|
|     | C0 (ppb) | Time (h) | Temperature (°C) | Ph       | Salinity (%) | Humic acids (mg/L) | CLO  | THA  | IMI  | ACE  |
| 1   | 1000.00  | 63.00    | 20.00            | 7.25     | 0.36         | 15.01              | 0.38 | 0.19 | 0.42 | 0.36 |
| 2   | 188.72   | 99.42    | 30.22            | 7.73     | 0.58         | 24.59              | 0.15 | 0.49 | 0.38 | 0.18 |
| 3   | 505.00   | 63.00    | 20.00            | 7.25     | 0.36         | 30.00              | 0.34 | 0.08 | 0.48 | 0.19 |
| 4   | 505.00   | 6.00     | 20.00            | 7.25     | 0.36         | 15.01              | 0.80 | 0.90 | 0.82 | 0.77 |
| 5   | 505.00   | 63.00    | 36.00            | 7.25     | 0.36         | 15.01              | 0.24 | 0.26 | 0.27 | 0.16 |
| 6   | 505.00   | 63.00    | 20.00            | 7.25     | 0.36         | 15.01              | 0.25 | 0.22 | 0.66 | 0.18 |
| 7   | 505.00   | 63.00    | 20.00            | 7.25     | 0.03         | 15.01              | 0.19 | 0.06 | 0.71 | 0.17 |
| 8   | 188.72   | 26.58    | 9.78             | 6.77     | 0.58         | 5.43               | 0.69 | 0.85 | 0.75 | 0.55 |
| 9   | 505.00   | 63.00    | 20.00            | 7.25     | 0.36         | 15.01              | 0.25 | 0.22 | 0.66 | 0.18 |
| 10  | 188.72   | 26.58    | 30.22            | 7.73     | 0.58         | 5.43               | 0.38 | 0.59 | 0.47 | 0.28 |
| 11  | 821.28   | 99.42    | 30.22            | 6.77     | 0.15         | 24.59              | 0.29 | 0.48 | 0.59 | 0.58 |
| 12  | 821.28   | 99.42    | 30.22            | 6.77     | 0.58         | 5.43               | 0.25 | 0.51 | 0.61 | 0.54 |
| 13  | 188.72   | 26.58    | 30.22            | 7.73     | 0.15         | 24.59              | 0.48 | 0.54 | 0.40 | 0.35 |
| 14  | 821.28   | 26.58    | 9.78             | 7.73     | 0.15         | 24.59              | 0.83 | 0.71 | 0.55 | 0.72 |
| 15  | 821.28   | 26.58    | 30.22            | 7.73     | 0.58         | 24.59              | 0.54 | 0.49 | 0.28 | 0.65 |
| 16  | 188.72   | 99.42    | 9.78             | 7.73     | 0.58         | 5.43               | 0.25 | 0.64 | 0.55 | 0.20 |
| 17  | 188.72   | 99.42    | 9.78             | 6.77     | 0.58         | 24.59              | 0.57 | 0.64 | 0.59 | 0.35 |
| 18  | 505.00   | 120.00   | 20.00            | 7.25     | 0.36         | 15.01              | 0.11 | 0.10 | 0.31 | 0.14 |
| 19  | 821.28   | 99.42    | 30.22            | 7.73     | 0.15         | 5.43               | 0.21 | 0.32 | 0.41 | 0.43 |
| 20  | 821.28   | 99.42    | 9.78             | 7.73     | 0.58         | 24.59              | 0.41 | 0.39 | 0.66 | 0.81 |
| 21  | 505.00   | 63.00    | 20.00            | 6.50     | 0.36         | 15.01              | 0.65 | 0.26 | 0.71 | 0.35 |
| 22  | 505.00   | 63.00    | 20.00            | 7.25     | 0.36         | 15.01              | 0.25 | 0.22 | 0.66 | 0.18 |
| 23  | 505.00   | 63.00    | 20.00            | 7.25     | 0.70         | 15.01              | 0.51 | 0.07 | 0.47 | 0.19 |
| 24  | 505.00   | 63.00    | 20.00            | 8.00     | 0.36         | 15.01              | 0.13 | 0.32 | 0.40 | 0.14 |
| 25  | 188.72   | 26.58    | 30.22            | 6.77     | 0.58         | 24.59              | 0.74 | 0.61 | 0.56 | 0.32 |
| 26  | 505.00   | 63.00    | 20.00            | 7.25     | 0.36         | 15.01              | 0.25 | 0.22 | 0.66 | 0.18 |
| 27  | 188.72   | 99.42    | 9.78             | 7.73     | 0.15         | 24.59              | 0.21 | 0.54 | 0.52 | 0.25 |
| 28  | 821.28   | 26.58    | 9.78             | 7.73     | 0.58         | 5.43               | 0.21 | 0.68 | 0.72 | 0.93 |
| 29  | 505.00   | 63.00    | 20.00            | 7.25     | 0.36         | 0.02               | 0.30 | 0.09 | 0.68 | 0.16 |
| 30  | 505.00   | 63.00    | 20.00            | 7.25     | 0.36         | 15.01              | 0.25 | 0.22 | 0.66 | 0.18 |
| 31  | 188.72   | 99.42    | 30.22            | 6.77     | 0.15         | 5.43               | 0.30 | 0.66 | 0.55 | 0.25 |

|    |        |       |       |      |      |       |      |      |      |      |
|----|--------|-------|-------|------|------|-------|------|------|------|------|
| 32 | 188.72 | 26.58 | 9.78  | 6.77 | 0.15 | 24.59 | 0.92 | 0.76 | 0.64 | 0.52 |
| 33 | 188.72 | 26.58 | 9.78  | 7.73 | 0.15 | 5.43  | 0.27 | 0.64 | 0.49 | 0.63 |
| 34 | 821.28 | 99.42 | 30.22 | 6.77 | 0.15 | 5.43  | 0.75 | 0.52 | 0.63 | 0.56 |
| 35 | 821.28 | 99.42 | 9.78  | 6.77 | 0.15 | 5.43  | 0.51 | 0.66 | 0.74 | 0.61 |
| 36 | 821.28 | 26.58 | 9.78  | 6.77 | 0.58 | 24.59 | 0.43 | 0.80 | 0.78 | 0.83 |
| 37 | 821.28 | 26.58 | 30.22 | 6.77 | 0.15 | 5.43  | 0.62 | 0.40 | 0.76 | 0.70 |
| 38 | 505.00 | 63.00 | 4.00  | 7.25 | 0.36 | 15.01 | 0.80 | 0.77 | 0.91 | 0.24 |
| 39 | 10.00  | 63.00 | 20.00 | 7.25 | 0.36 | 15.01 | 0.36 | 0.58 | 0.21 | 0.45 |
| 40 | 505.00 | 63.00 | 20.00 | 7.25 | 0.36 | 15.01 | 0.25 | 0.22 | 0.66 | 0.18 |

---

Table S10. Analysis of variance results of target NEOs in biodegradation experiment

| Source         | CLO     |         | ACE     |         | IMI     |         | THA     |         |
|----------------|---------|---------|---------|---------|---------|---------|---------|---------|
|                | F-Value | P-value | F-Value | P-value | F-Value | P-value | F-Value | P-value |
| Model          | 6.00    | <0.0001 | 6.92    | <0.0001 | 9.70    | <0.0001 | 8.72    | <0.0001 |
| A-C0           | 1.05    | 0.3146  | 3.76    | 0.0610  | 31.60   | <0.0001 | 9.68    | 0.0053  |
| B- Time        | 40.51   | <0.0001 | 3.43    | 0.0730  | 27.46   | <0.0001 | 15.32   | 0.0008  |
| C-Temperature  | 16.35   | 0.0005  | 18.48   | 0.0001  | 8.56    | 0.0078  | 21.32   | 0.0001  |
| D- pH          | 8.03    | 0.0092  | 14.84   | 0.0005  | 0.95    | 0.3401  | 1.48    | 0.2380  |
| E-Salinity     | 1.48    | 0.2348  | 0.16    | 0.6915  | 0.12    | 0.7305  | 0.90    | 0.3537  |
| F- Humic acids | 7.86    | 0.0098  | 2.98    | 0.0938  | 0.06    | 0.8081  | 0.11    | 0.7425  |
| R <sup>2</sup> | 0.7894  |         | 0.5572  |         | 0.8823  |         | 0.8819  |         |
| Adep Precision | 10.338  |         | 11.384  |         | 10.142  |         | 10.297  |         |

$$C_{CLO} = 0.71 + 0.067 * A - 0.094 * B - 0.095 * C + 1.63E - 3 * D + 1.85E - 3 * E - 7.17E - 3 * F + 0.086 * A * B - 0.030 * A * D - 0.02 * A * E + 0.077 * B * C + 0.035 * C * D - 0.012 * C * F + 0.019 * D * E + 0.013 * E * F + 0.034 * C^2 - 0.028 * D^2 - 0.022 * E^2 - 0.097 * F^2$$

(S1)

$$C_{THA} = 0.46 - 0.038 * A - 0.027 * B - 0.028 * C - 0.025 * D + 1.03E - 3 * E - 7.26E - 3 * F - 0.01 * A * C + 0.013 * A * D + 0.014 * A * F - 0.034 * B * D + 0.021 * B * E + 0.032 * C * D - 0.064 * C * E + 0.018 * C * F - 0.015 * D * E + 0.035 * D * F - 0.11 * A^2 - 0.019 * B^2 - 0.025 * C^2 - 0.030 * D^2 - 0.031 * E^2 - 0.030 * F^2$$

(S2)

$$C_{ACE} = 0.35 - 0.13 * A - 0.03 * B - 0.14 * C - 0.042 * D - 0.031 * E + 0.026 * F - 0.056 * A * B - 0.031 * A * D + 0.084 * A * E - 0.11 * A * F - 0.077 * B * D + 0.022 * B * E - 0.056 * B * F - 0.068 * C * E + 0.027 * D * E + 0.096 * D * F + 0.03 * E * F$$

(S3)

$$C_{IMI} = 0.47 + 0.03 * A - 0.05 * B - 0.12 * C - 0.064 * D - 0.057 * E - 0.016 * F - 0.058 * A * B - 0.069 * A * D + 0.046 * A * E - 0.12 * B * D + 0.13 * B * E - 0.1 * B * F + 0.093 * C * D - 0.10 * B * F + 0.093 * C * D - 0.10 * C * E + 0.045C * F - 0.032 * D * F + 0.65 * E * F$$

(S4)

where  $C_{CLO}$ ,  $C_{THA}$ ,  $C_{ACE}$ , and  $C_{IMI}$  were the concentrations of CLO, THA, ACE, and IMI at time t, respectively; A, B, C, D, E, and F indicated that the initial concentrations of NEOs (ppb), the reaction time (h), temperature (°C), pH, Salinity, and humic acids (mg/L), respectively.

$$C_{CLO} = 0.77 - 0.016 * A - 0.014 * B - 4.902E - 3 * C - 0.055 * D - 0.085 * E - 0.087 * F - 0.016 * G + 0.038 * A * C - 0.045 * A * F - 0.14 * B^2 \quad (S5)$$

$$C_{THA} = 0.60 - 3.346E - 3 * A - 0.041 * B - 4.243E - 3 * C - 0.048 * D - 0.060 * E - 0.063 * F - 4.52E - 3 * G + 0.028 * A * C - 0.028 * A * F - 0.02 * B * F + 0.018 * E * F - 0.029 * B^2 - 0.035 * D^2 - 0.032 * F^2 - 0.030 * G^2 \quad (S6)$$

$$C_{ACE} = 0.84 - 0.021 * A - 0.056 * B - 8.71E - 3 * C - 0.069 * D - 0.079 * E - 0.081 * F - 6.96E - 3 * G + 0.018 * A * B + 0.036 * A * C + 0.021 * A * D - 0.035 * A * F - 0.025 * B * F - 0.013 * C * E + 0.014 * D * F + 0.02 * E * F - 0.072 * A^2 - 0.033 * D^2 - 0.029 * F^2 \quad (S7)$$

$$C_{IMI} = 0.90 - 5.51E - 3 * A - 0.048 * B - 0.013 * C - 0.075 * D - 0.076 * E - 0.091 * F - 7.69E - 3 * G + 0.025 * A * B + 0.038 * A * C + 0.022 * A * D - 0.041 * A * F - 0.025 * B * F - 0.012 * C * E + 0.011 * D * F + 0.019 * E * F - 4.53E - 3 * F * G - 0.016 * A^2 - 0.056 * B^2 - 0.013 * C^2 - 0.031 * D^2 - 0.037 * E^2 - 0.029 * F^2 - 0.024 * G^2 \quad (S8)$$

where  $C_{CLO}$ ,  $C_{THA}$ ,  $C_{ACE}$ , and  $C_{IMI}$  were the concentrations of CLO, THA, ACE, and IMI at time t, respectively; A, B, C, D, E, F, and G indicated that the initial concentrations of NEOs (ppb), pH, Salinity, temperature (°C), the solar time (min), solar radiation (W), and humic acids (mg/L), respectively.



$$C_{CLO} = 0.38 - 0.028 * A - 0.17 * B - 0.11 * C - 0.077 * D + 0.034 * E + 0.075 * F + 0.065 * A * B + 0.055 * A * C - 0.11 * A * E - 0.032 * A * F - 0.042 * B * D - 0.087 * B * F - 0.077 * C * F + 0.073 * D * E + 0.088 * D * F \quad (S9)$$

$$C_{THA} = 0.18 - 0.072 * A - 0.089 * B - 0.11 * C - 0.028 * D + 0.022 * E + 7.85E - 3 * F - 0.027 * A * D - 0.026 * A * E + 0.046 * B * C - 0.033 * B * D - 0.035 * B * E - 0.047 * B * F + 0.024 * D * E + 0.090 * A^2 + 0.14 * B^2 + 0.14 * C^2 + 0.052 * D^2 - 0.040 * E^2 \quad (S10)$$

$$C_{ACE} = 0.57 + 0.044 * A - 0.042 * B - 0.097 * C - 0.087 * D - 9.04E - 3 * E - 0.039 * F \quad (S11)$$

$$C_{IMI} = 0.17 + 0.12 * A - 0.11 * B - 0.063 * C - 0.022 * D + 7.53E - 3 * E + 5.38E - 3 * F + 0.029 * A * B + 0.036 * A * E + 0.025 * B * C + 0.032 * B * D - 0.029 * C * D - 0.028 * C * E + 0.036 * E * F + 0.11 * A^2 + 0.13 * B^2 + 0.031 * C^2 + 0.0548 * D^2 \quad (S12)$$

where  $C_{CLO}$ ,  $C_{THA}$ ,  $C_{ACE}$ , and  $C_{IMI}$  were the concentrations of CLO, THA, ACE, and IMI at time t, respectively; A, B, C, D, E, and F indicated that the initial concentrations of NEOs (ppb), the reaction time (h), temperature (°C), pH, Salinity, and humic acids (mg/L), respectively.

Figure S1

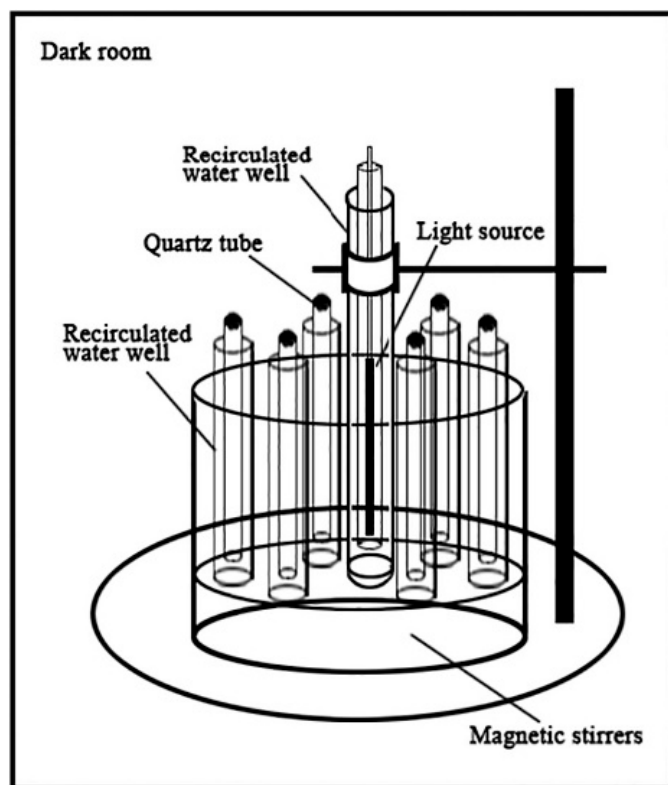

Figure S1. Rotary photochemical reactor
